# Supplementary material
Source: publisher site journal article supplement (https://www.dovepress.com/article/303978)
Supplement: Supplementary file 1 [file get_supplementary_file.php]

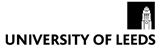

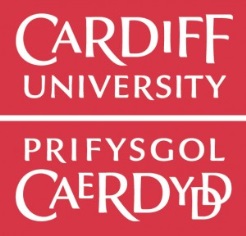


**A Questionnaire to Explore the Concerns and**

**Quality of Life Impacts and Consequences**

**of Paediatric Hip Conditions [version 2]**

Please will you complete the following questionnaire. It comprises a set of questions that we have developed with and for persons who have a diagnosis of Hip Dysplasia and other paediatric hip conditions, in particular, Perthes and SUFE.

Please complete all the questions. For your ease, most of the questions can be answered by ticking a box. Others ask you to write in your own words about the quality of life impacts that you have or are experiencing *because of your hip condition*. When you have completed the questionnaire, please send it back using the link provided on the form, *or via e-mail* to ….

You will notice that we are asking you to write in your name and full contact details. This will enable us to send you any subsequent questionnaires and to provide you with feedback on the project’s results. We assure you that your responses will be treated in confidence and all data will be anonymised during the analysis and subsequent verbal and written reports. Thank you for your help with our research.

The questionnaire explores different possible effects or quality of life impacts that you may be experiencing currently or have experienced *because of your hip condition*. Many of the questions ask you to indicate the extent to which you agree with the particular statement, graded from ‘strongly disagree’ to ‘strongly agree’. For a few others, we ask you to write down in your words what you feel.

## **First of all, would you please provide your contact details and some personal information.**

Name: Date questionnaire completed:

Address:

e-mail (if any):

Hip Diagnosis please select on of the following:

DDH

Perthes

SUFE

**QUESTION 1: How old are you?** …….

**QUESTION 2: Are you:** Male Female

**QUESTION 3: Please indicate which best describes your employment status now:**

… In paid, full-time work (30 hours or more a week) … At school

… In paid, part-time work (less than 30 hours a week) …. In further education

… Unemployed, looking for a job … Retired

… Not working but looking after your home/family

… Not working due to ill health

## **Now, we would like to ask you some general questions about your hip(s). Where appropriate, please just tick the most relevant box or add the requested data.**

**QUESTION 4: Which hip or hips are affected?**

**Left**  **Right**  **Both**

**QUESTION 5: How long did it take from your very first concerns of your hip problem to your being told by a physician or hip specialist that you had Hip Dysplasia?**

About 6 months 6 months 2 – 5 years 5-10 years More than I don’t

to 2 years 10 years remember

**QUESTION 6: Approximately when did the pain in your hip or hips or difficulty in getting around get to the point at which you needed to seek medical help, for example, from the GP, physiotherapist or osteopath?**

**Left Hip** ------------------------- (month and year)

**Right Hip** ------------------------- (month and year)

**QUESTION 7: Which of the following healthcare practitioners did you see about you hip(s) *before you were diagnosed* with Hip Dysplasia, Perthes or SUFE?**

GP

Physiotherapist

Osteopath

Other (please indicate who) **-----------------------------------------**

**QUESTION 8: Approximately when were you first *diagnosed* with this hip condition?**

------------------------- (month and year)

**QUESTION 9: Approximately when were you *referred* to a specialist hip clinic or consultant for specialist treatment and help for Hip Dysplasia, Perthes or SUFE?**

------------------------- (month and year)

**QUESTION 10: Which of the following best describes your current treatment status?**

**Left Hip Right Hip**

Deciding on treatment options ---- Deciding on treatment options ----

Waiting for surgery ---- Waiting for surgery -----

Up to 12 months post op ---- Up to 12 months post op -----

Over 12 Months post op ---- Over 12 Months post op -----

**QUESTION 11: Which kind of surgery have you had/ or are you waiting for?**

**Left Hip Right Hip**

Joint Conservation Surgery: e.g*. PAO,* Joint Conservation Surgery: e.g. *PAO,* *Triple Triple Osteotomy, Femoral Osteotomy* ----- *Osteotomy, Femoral Osteotomy* ----- Resurfacing Surgery ----- Resurfacing Surgery ----- Total Hip replacement ----- Total Hip replacement ----- Other: please say what this will be …… Other: please say what this will be …….. …………………. ………………….. I don’t know ----- I don’t know -----

## **QUESTION 12: Now, we would like to ask you about the pain you may be experiencing because of your hip condition.**

## Please rate your level of agreement with each of the statements below. Put a cross, or circle the relevant number, in the box that best describes the extent of your agreement.

| **Statement** | **Strongly Disagree** | **Disagree** | **In-Between** | **Agree** | **Strongly Agree** | **Not Relevant** |
| --- | --- | --- | --- | --- | --- | --- |
| I am in pain pretty much all the time. | 0 | 1 | 2 | 3 | 4 | 8 |
| The aches and pains have become more frequent and more painful. | 0 | 1 | 2 | 3 | 4 | 8 |
| I have to pace myself each day to manage the pain; if I do too much one day I pay for it the next day. | 0 | 1 | 2 | 3 | 4 | 8 |
| The pain affects my concentration. | 0 | 1 | 2 | 3 | 4 | 8 |
| I have to take painkillers just to get through the day. | 0 | 1 | 2 | 3 | 4 | 8 |
| At times I find myself in a lot of pain after walking when out with friends in just trying to do everyday things. | 0 | 1 | 2 | 3 | 4 | 8 |
| I have to think every day about what I will do and how far I will have to walk. | 0 | 1 | 2 | 3 | 4 | 8 |

| **Statement** | **Strongly Disagree** | **Disagree** | **In-Between** | **Agree** | **Strongly Agree** | **Not Relevant** |
| --- | --- | --- | --- | --- | --- | --- |
| I have had to learn to pace myself; if I do a lot one day the next I have to try to rest. | 0 | 1 | 2 | 3 | 4 | 8 |
| It’s distressing and l to sense my physical capability decreasing as my hip condition progresses. | 0 | 1 | 2 | 3 | 4 | 8 |
| I walk with a slight waddle/swaying motion and a forward tilt. | 0 | 1 | 2 | 3 | 4 | 8 |

## **QUESTION 13: Now, we would like to ask you about the impact arising because of your hip condition in relation to your education and working life.**

## *Please rate your level of agreement with each of the statements below.

| **Statement** | **Strongly Disagree** | **Disagree** | **In-Between** | **Agree** | **Strongly Agree** | **Not Relevant** |
| --- | --- | --- | --- | --- | --- | --- |
| My hip condition led to some depression that made things really tough. | 0 | 1 | 2 | 3 | 4 | 8 |
| I found it really hard to form relationships at school/work because of my hip condition. | 0 | 1 | 2 | 3 | 4 | 8 |
| My hip condition makes it hard for me to always maintain concentration. | 0 | 1 | 2 | 3 | 4 | 8 |

**QUESTION 14: Now, we would like to ask you about the impact arising *because of your hip condition* in relation to your *participation in sports and exercise.***

## Please rate your level of agreement with each of the statements below.

| **Statement** | **Strongly Disagree** | **Disagree** | **In-Between** | **Agree** | **Strongly Agree** | **Not Relevant** |
| --- | --- | --- | --- | --- | --- | --- |
| I am only able to do low impact activities. | 0 | 1 | 2 | 3 | 4 | 8 |
| I used to love being active, being outside, going to the gym but, because of my hips, there is little I can do now. | 0 | 1 | 2 | 3 | 4 | 8 |
| I want to keep trim and in shape but it has got harder and harder to find activities that I can do. | 0 | 1 | 2 | 3 | 4 | 8 |
| I am very conscious about my weight and how my body looks due to my restricted mobility and restricted exercise that I can do. | 0 | 1 | 2 | 3 | 4 | 8 |
| Now I can only do low impact activities such as swimming or walking. | 0 | 1 | 2 | 3 | 4 | 8 |
| I worry about making my hip worse when doing sports and activity. | 0 | 1 | 2 | 3 | 4 | 8 |

**QUESTION 15: Now, we would like to ask you about the impact arising *because of your hip condition* on/for your*****family life***.

## Please rate your level of agreement with each of the statements below.

| **Statement** | **Strongly Disagree** | **Disagree** | **In-Between** | **Agree** | **Strongly Agree** | **Not Relevant** |
| --- | --- | --- | --- | --- | --- | --- |
| I feel I have lost out on a time when I should have been enjoying myself. | 0 | 1 | 2 | 3 | 4 | 8 |
| It upsets me that my partner and/or family or parents have to care for me. | 0 | 1 | 2 | 3 | 4 | 8 |
| I don’t get to spend quality time with my partner and/or family or parents because they spend so much time caring for me | 0 | 1 | 2 | 3 | 4 | 8 |

## **QUESTION 16: And, about any impact arising because of your hip condition on or for your** **physical intimacy**. Please complete this question only if you are aged 18 or over.

## Please rate your level of agreement with each of the statements below.

| **Statement (relating to Physical Intimacy). Only complete this section, if you are *aged 18 or over*. Thank you.** | **Strongly Disagree** | **Disagree** | **In-Between** | **Agree** | **Strongly Agree** | **Not Relevant** |
| --- | --- | --- | --- | --- | --- | --- |
| Since my hip pain has got worse, I haven't been in the mood for sex. | 0 | 1 | 2 | 3 | 4 | 8 |
| Hip dysplasia has a big effect on your love life one way or another. | 0 | 1 | 2 | 3 | 4 | 8 |
| The intimacy between us has diminished because of my hip. | 0 | 1 | 2 | 3 | 4 | 8 |

**QUESTION 17: Now, we would like to ask you about the impact arising *because of your hip condition* on *your social life and relationship with others*.**

## Please rate your level of agreement with each of the statements below.

| **Statement** | **Strongly Disagree** | **Disagree** | **In-Between** | **Agree** | **Strongly Agree** | **Not Relevant** |
| --- | --- | --- | --- | --- | --- | --- |
| I feel uncomfortable and find it difficult explaining about my hips. | 0 | 1 | 2 | 3 | 4 | 8 |
| I struggle to trust people, fear rejection and don’t go out much to meet new people. | 0 | 1 | 2 | 3 | 4 | 8 |
| I have stopped dating now. | 0 | 1 | 2 | 3 | 4 | 8 |
| My social life suffers as I try to minimise any trip that involves going outside or much activity. | 0 | 1 | 2 | 3 | 4 | 8 |
| I am having or have had to put my social life on hold. | 0 | 1 | 2 | 3 | 4 | 8 |

**QUESTION 18: Now, we would like to ask you about the impact arising *because of your hip condition* on *your confidence and self-esteem***.

## Please rate your level of agreement with each of the statements below.

| **Statement** | **Strongly Disagree** | **Disagree** | **In-Between** | **Agree** | **Strongly Agree** | **Not Relevant** |
| --- | --- | --- | --- | --- | --- | --- |
| I feel so low in confidence I have just withdrawn from the world for a while. | 0 | 1 | 2 | 3 | 4 | 8 |
| My confidence and self-esteem are very low because of my hip condition. | 0 | 1 | 2 | 3 | 4 | 8 |
| My confidence has decreased since my hip condition has worsened. | 0 | 1 | 2 | 3 | 4 | 8 |

| **Statement** | **Strongly Disagree** | **Disagree** | **In-Between** | **Agree** | **Strongly Agree** | **Not Relevant** |
| --- | --- | --- | --- | --- | --- | --- |
| My outward appearance (scarring, posture and/or limp) has had a profound effect on my self-esteem. | 0 | 1 | 2 | 3 | 4 | 8 |
| I am very self-conscious about my hip condition. | 0 | 1 | 2 | 3 | 4 | 8 |
| I have lost my sense of self as my hips are taking/have taken over my life. | 0 | 1 | 2 | 3 | 4 | 8 |

**QUESTION 19: Now, we would like to ask you about the impact arising *because of your hip condition* on *your body image*.**

## Please rate your level of agreement with each of the statements below.

| **Statement** | **Strongly Disagree** | **Disagree** | **In-Between** | **Agree** | **Strongly Agree** | **Not Relevant** |
| --- | --- | --- | --- | --- | --- | --- |
| The whole ‘getting undressed’, putting on my working-out clothes, scarring, limping and feel embarrassed. | 0 | 1 | 2 | 3 | 4 | 8 |
| I don’t feel good about my body. | 0 | 1 | 2 | 3 | 4 | 8 |
| I feel I hate my body. | 0 | 1 | 2 | 3 | 4 | 8 |
| I feel overweight and unattractive. | 0 | 1 | 2 | 3 | 4 | 8 |
| I always prided myself on having a strong lean body and being in shape. | 0 | 1 | 2 | 3 | 4 | 8 |
| I am self-conscious about the way I look as I always wear trousers or jeans, not skirts and no heels. | 0 | 1 | 2 | 3 | 4 | 8 |

| **Statement** | **Strongly Disagree** | **Disagree** | **In-Between** | **Agree** | **Strongly Agree** | **Not Relevant** |
| --- | --- | --- | --- | --- | --- | --- |
| I am self-conscious about the way I look as I can’t wear tight clothes or shorts or anything that emphasises my legs or hips. | 0 | 1 | 2 | 3 | 4 | 8 |
| I am very self-conscious about my uneven gait or using a walking stick. | 0 | 1 | 2 | 3 | 4 | 8 |
| There is an indignity of being young and having to be careful about what clothes and shoes to wear. | 0 | 1 | 2 | 3 | 4 | 8 |

**QUESTION 20: Now, we would like to ask you about the impact arising *because of your hip condition* on *your emotions*.**

## Please rate your level of agreement with each of the statements below.

| **Statement** | **Strongly Disagree** | **Disagree** | **In-Between** | **Agree** | **Strongly Agree** | **Not Relevant** |
| --- | --- | --- | --- | --- | --- | --- |
| I feel angry and emotional at times; I have lost out on so many things. | 0 | 1 | 2 | 3 | 4 | 8 |
| I have become increasingly frustrated about losing my independence and having to depend on others to do things for me. | 0 | 1 | 2 | 3 | 4 | 8 |
| I feel lost at the moment and I am not the person I want to be. | 0 | 1 | 2 | 3 | 4 | 8 |
| My hip condition depresses me. | 0 | 1 | 2 | 3 | 4 | 8 |

| **Statement** | **Strongly Disagree** | **Disagree** | **In-Between** | **Agree** | **Strongly Agree** | **Not Relevant** |
| --- | --- | --- | --- | --- | --- | --- |
| I try to work around my limitations rather than letting them stop me and to avoid feeling down. | 0 | 1 | 2 | 3 | 4 | 8 |
| People don’t understand that some days I can do most things but on others I can hardly do anything. | 0 | 1 | 2 | 3 | 4 | 8 |
| The pain makes me emotional and tearful. | 0 | 1 | 2 | 3 | 4 | 8 |

**QUESTION 21: Now, we would like to ask you about the impact arising *because of your hip condition* on *your overall quality of life*.**

## Please rate each statement with each of the statements below. Please do this in relation to **two** time points: the first, the one that best describes how you feel now, at this time; the second, the one that best describes how you felt about three months ago.

| **Statement** | **Strongly Disagree** | **Disagree** | **In-Between** | **Agree** | **Strongly Agree** | **Not Relevant** |
| --- | --- | --- | --- | --- | --- | --- |
| I want to stay fit and in shape but my hip makes this difficult.   - At this time - About three months ago | 0  0 | 1  1 | 2  2 | 3  3 | 4  4 | 8  8 |
| My life is very disrupted by my hip condition.   - At this time - About three months ago | 0  0 | 1  1 | 2  2 | 3  3 | 4  4 | 8  8 |
| I am forgetting what it is like not to be dominated by pain and not being able to do things.   - At this time - About three months ago | 0  0 | 1  1 | 2  2 | 3  3 | 4  4 | 8  8 |
| I feel generally down and get upset because of my hips and their impact on my life.   - At this time - About three months ago | 0  0 | 1  1 | 2  2 | 3  3 | 4  4 | 8  8 |
| **Statement** | **Strongly Disagree** | **Disagree** | **In-Between** | **Agree** | **Strongly Agree** | **Not Relevant** |
| I have had to adjust my life and what I do in order to cope with my hips.   - At this time - About three months ago | 0  0 | 1  1 | 2  2 | 3  3 | 4  4 | 8  8 |
| It is an emotional and a physical battle because of my hip.   - At this time - About three months ago | 0  0 | 1  1 | 2  2 | 3  3 | 4  4 | 8  8 |
| I feel I have lost a lot of my life and identity.   - At this time - About three months ago | 0  0 | 1  1 | 2  2 | 3  3 | 4  4 | 8  8 |
| I have had to give up things until I no longer have a normal life.   - At this time - About three months ago | 0  0 | 1  1 | 2  2 | 3  3 | 4  4 | 8  8 |
| I struggle to cope with work or my education.   - At this time - About three months ago | 0  0 | 1  1 | 2  2 | 3  3 | 4  4 | 8  8 |
| I don’t feel good about myself.   - At this time - About three months ago | 0  0 | 1  1 | 2  2 | 3  3 | 4  4 | 8  8 |
| I am tired and fatigued from the toil and ongoing pressure of my hip condition.   - At this time - About three months ago | 0  0 | 1  1 | 2  2 | 3  3 | 4  4 | 8  8 |

| **Statement** | **Strongly Disagree** | **Disagree** | **In-Between** | **Agree** | **Strongly Agree** | **Not Relevant** |
| --- | --- | --- | --- | --- | --- | --- |
| Looking overall, my hip condition has had a big impact on my life.   - At this time - About three months ago | 0  0 | 1  1 | 2  2 | 3  3 | 4  4 | 8  8 |
| I value my independence; the thought of not being able to look after myself and being a burden to others in the future is devastating.   - At this time - About three months ago | 0  0 | 1  1 | 2  2 | 3  3 | 4  4 | 8  8 |

**QUESTION 22: Thinking overall, please rate your overall satisfaction with your current level of pain and other discomfort experienced from your hip condition on a scale from 1 to 10.**  A score of ‘1’ would represent, *‘I am very dissatisfied/finding it very hard to cope’*. In contrast, a score of ‘10’ would represent, *‘I am very satisfied/coping very well’*.

**-----------** (score from 1 to 10)

**QUESTION 23: Apart from the hip problems you have, would you say your health *in general* is now:**

Excellent Very Good Good Fair Poor

**QUESTION 24:** **Apart from the hip problems you have, how would you rate your health *in general* compared to *about 3 months* ago?**

Much Better Somewhat Better About the Same Somewhat Worse Much Worse

Now Now Now Now

**QUESTION 25: Please rate your overall satisfaction with the specialist treatment and care you are *currently* receiving for your Hip Dysplasia, Perthes or SUFE.**

Excellent Very Good Good Fair Poor

**QUESTION 26:** **How would you rate your overall satisfaction with the specialist treatment and care you received for your Hip Dysplasia, Perthes or SUFE compared to *about 3 months* ago?**

Much Better Somewhat Better About the Same Somewhat Worse Much Worse

Now Now Now Now

**QUESTION 27: Hopes and Fears. We would like to ask you about your greatest hope and worst fear about your quality of life overall, and the impact and consequences arising *because of your hip(s).***

*(a) My greatest hope is*

…………………………………………………………………………………………………………………………………………………………………………………………………………………………

……………………………………………………………………………………………………………

……………………………………………………………………………………………………………

……………………………………………………………………………………………………………

*(b) My worst fear is*

…………………………………………………………………………………………………………………………………………………………………………………………………………………………

…………………………………………………………………………………………………………………………………………………………………………………………………………………………

……………………………………………………………………………………………………………

(c)  *If there is anything else affecting your quality of life arising because of your hip(s) that is of great importance or significance at the present time*, and that has not been covered in your previous responses above, please write it below in the space provided.

…………………………………………………………………………………………………………………………………………………………………………………………………………………………

…………………………………………………………………………………………………………………………………………………………………………………………………………………………

……………………………………………………………………………………………………………

**QUESTION 28: Please can you tell us how *easy* or *difficult it was to complete this questionnaire***

Very Easy Quite Easy In-between Quite Difficult Very Difficult

**QUESTION 29: About how long it took you to complete the questionnaire?**

**……..** (mins)

**QUESTION 30: Do you think that your responses to the questions in this questionnaire would be helpful to you and your surgeon in discussing your hip condition and treatment possibilities?**

No

Yes

**Please can you briefly outline why you think it may, or may not, be helpful.**

…………………………………………………………………………………………………………………………………………………………………………………………………………………………

…………………………………………………………………………………………………………………………………………………………………………………………………………………………

……………………………………………………………………………………………………………

| *Thank you very much for taking the time to complete this questionnaire and for your involvement in our research. Please will you now send the questionnaire back to us using the link provided on the form, or via e-mail to* ….. |
| --- |
